# Supplementary material for: Improved Charge Separation in WO3/CuWO4 Composite Photoanodes for Photoelectrochemical Water Oxidation
Source: Materials (Basel). 2016 May 7;9(5):348. doi: 10.3390/ma9050348 (PMC5503067; doi:10.3390/ma9050348)
Supplement: Supplementary file 1 [file materials-09-00348-s001.pdf]

## Supplementary Materials: Improved Charge Separation in WO<sub>3</sub>/CuWO<sub>4</sub> Composite Photoanodes for Photoelectrochemical Water Oxidation

Danping Wang, Prince Saurabh Bassi, Huan Qi, Xin Zhao, Gurudayal, Lydia Helena Wong, Rong Xu, Thirumany Sritharan and Zhong Chen

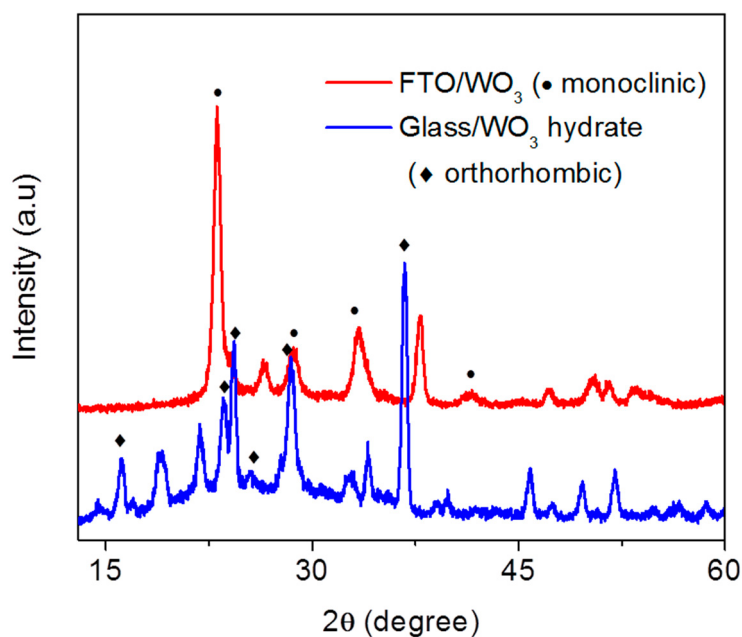

**Figure S1.** XRD patterns of different WO<sub>3</sub> phases obtained from magnetron sputtering on FTO (**red**) and normal glass slide (**blue**) substrates, which showed the FTO layer helped to induce the crystal growth of monoclinic WO<sub>3</sub>.

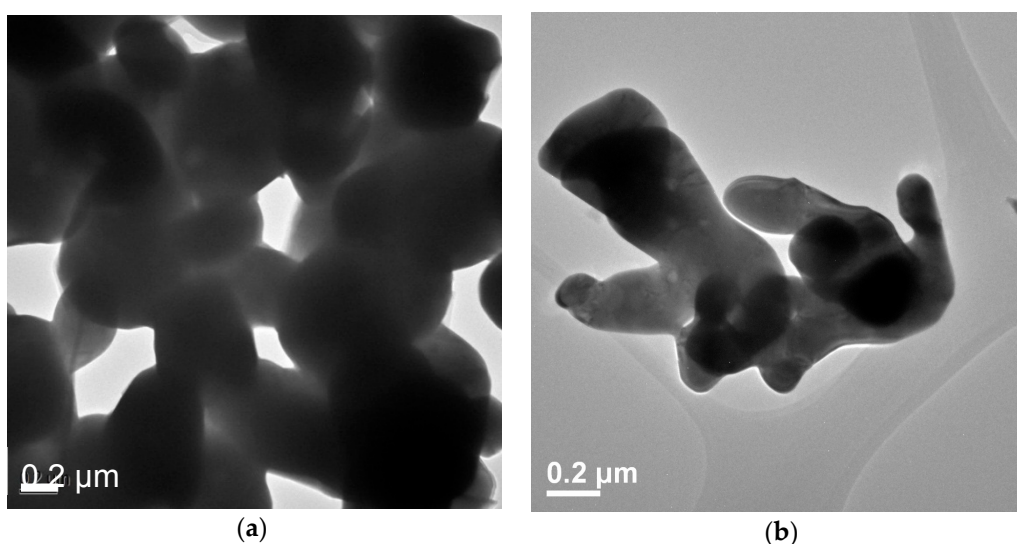

**Figure S2.** TEM images of particles scraped from WO<sub>3</sub>/CuWO<sub>4</sub>, indicating network morphology of the CuWO<sub>4</sub> layer. (a) Network structure of CuWO<sub>4</sub> layer; (b) Branched CuWO<sub>4</sub> nanoparticles from broken network piece.

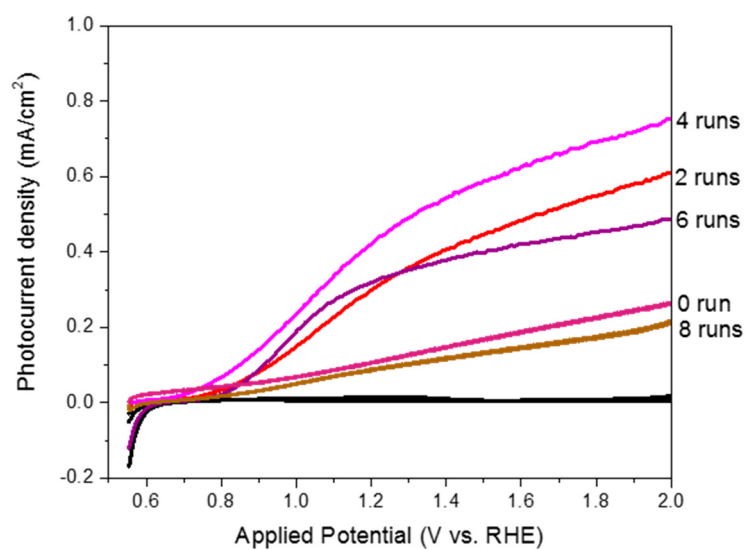

**Figure S3.** Photocurrent comparison of thin film obtained from different runs of dip coating. (Colored lines: Photocurrent under AM 1.5G illumination, Black lines: dark current).

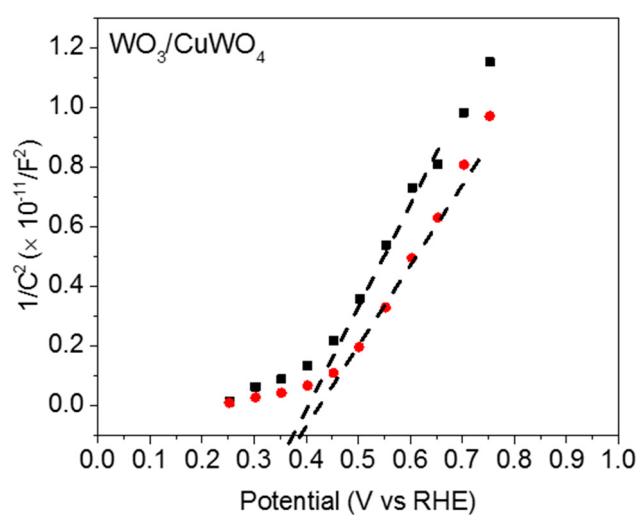

**Figure S4.** Mott-Schottky plots of  $\text{WO}_3/\text{CuWO}_4$  thin film at 10 k (black) and 5 k Hz (red) under dark condition.

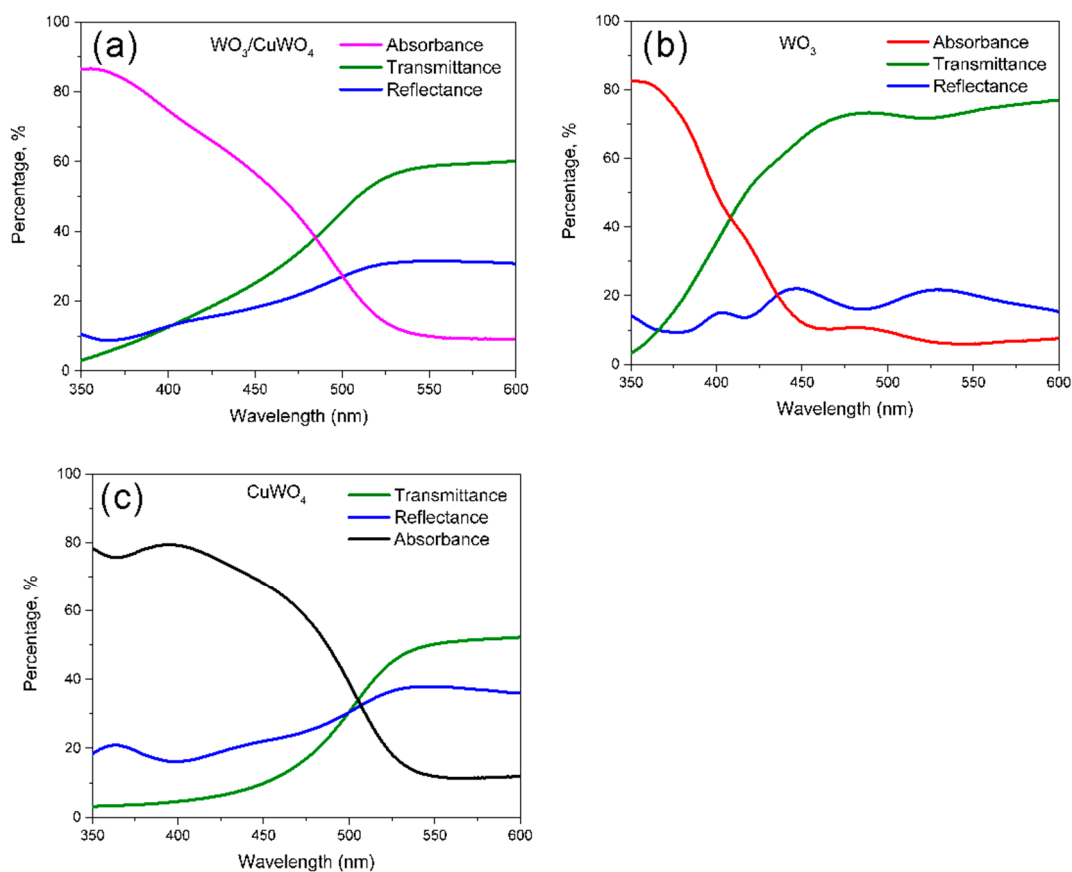

**Figure S5.** Absorption efficiency of: (a)  $\text{WO}_3/\text{CuWO}_4$ ; (b)  $\text{WO}_3$ ; and (c)  $\text{CuWO}_4$  thin films by measuring the transmission and reflection spectra using an integrating sphere (Absorbance ( $\eta_{\text{abs}}$ ) =  $1 - \text{Transmittance} - \text{Reflectance}$ ).

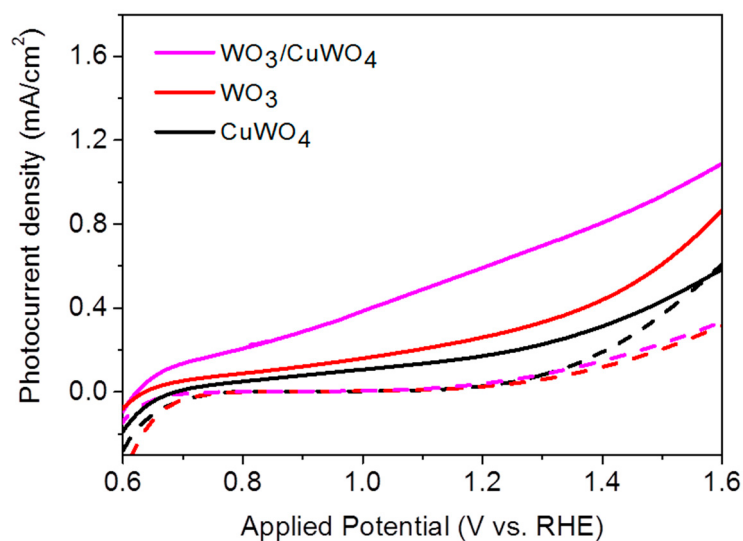

**Figure S6.** Linear sweep voltammetry of all samples with (solid lines) and without the illumination of AM 1.5 (dashed lines), measured in 0.5 M  $\text{Na}_2\text{SO}_4$  + 0.5 M  $\text{H}_2\text{O}_2$  aqueous solution.
